# Supplementary material for: Photoluminescence of LaI3 switched on and off by association and dissociation of non-luminescent tetrahydrofuran
Source: Royal Society of Chemistry journal article supplement (doi:10.1039/d1dt00162k), 2021-01-01
Supplement: d1dt00162k1.pdf [file d1dt00162k1.pdf]

## Supporting Information

# Photoluminescence of $\text{LaI}_3$ Switched on and off by Association and Dissociation of Non-luminescent Tetrahydrofuran

Yangjuan Li,<sup>ab</sup> Xiuting Chen <sup>a</sup> and Yu Gong <sup>\*a</sup>

a Department of Radiochemistry, Shanghai Institute of Applied Physics, Chinese Academy of Sciences, Shanghai, 201800, China.

b School of Nuclear Science and Technology, University of Chinese Academy of Sciences, Beijing, 100049, China.

E-mail: [gongyu@sinap.ac.cn](mailto:gongyu@sinap.ac.cn)

## Table of Contents

|                                                                                                                  |     |
|------------------------------------------------------------------------------------------------------------------|-----|
| <b>I. Experimental Procedures</b> .....                                                                          | S3  |
| General information.....                                                                                         | S3  |
| Synthesis of $\text{LaI}_3(\text{THF})_4$ .....                                                                  | S3  |
| Detection of THF in n-hexane.....                                                                                | S3  |
| Detection of gaseous THF in argon atmosphere.....                                                                | S3  |
| Quantum chemical calculations.....                                                                               | S4  |
| <b>II. Characterization</b> .....                                                                                | S4  |
| Fig. S1. Time-resolved emission intensity decay of $\text{LaI}_3(\text{THF})_4$ .....                            | S4  |
| Fig. S2. Thermal ellipsoid plot of $\text{LaI}_3(\text{THF})_4$ .....                                            | S4  |
| Fig. S3. $^1\text{H}$ NMR spectrum of $\text{LaI}_3(\text{THF})_4$ at 294.1 K in $\text{C}_6\text{D}_6$ .....    | S5  |
| Fig. S4. $^{13}\text{C}$ NMR spectrum of $\text{LaI}_3(\text{THF})_4$ at 293.7 K in $\text{C}_6\text{D}_6$ ..... | S5  |
| Fig. S5. UV–visible absorption spectrum of $\text{LaI}_3$ in THF.....                                            | S6  |
| Fig. S6. Diffuse reflectance spectrum of $\text{LaI}_3(\text{THF})_4$ .....                                      | S6  |
| Table S1. Crystal data and structure refinements for complex of $\text{LaI}_3(\text{THF})_4$ .....               | S7  |
| Cartesian coordinates for complex $\text{LaI}_3(\text{THF})_4$ at the CAM-B3LYP level of theory.....             | S8  |
| <b>III. References</b> .....                                                                                     | S10 |

## I. Experimental Procedures

### General information

All reactions were carried out using a Vigor Ar-atmosphere glove box (<1 ppm O<sub>2</sub>/H<sub>2</sub>O). Solvents were dried and degassed through a Vigor solvent purification system and stored over 4Å sieves for 24h before use. Anhydrous LaI<sub>3</sub> was used as purchased. Powder X-ray diffraction measurements were conducted on a X'Pert Pro MPD diffractometer using Cu-Kα1 radiation. Single crystal X-ray Intensity data were collected on Bruker D8 Venture (Mo Kα) at 192 K. NMR spectra were recorded on Zhongke-Niujiin Quantum-I Plus 400 spectrometer (Zhongke-Niujiin, Wuhan, China). <sup>1</sup>H and <sup>13</sup>C NMR chemical shifts (δ) are reported in ppm and were calibrated to residual solvent peaks. UV–visible absorption spectra were recorded on a Cary 6000i Agilent spectrophotometer, and diffuse reflectance spectrum was recorded on the same spectrophotometer equipped with an internal DRA 2500 integrating sphere using BaSO<sub>4</sub> as a reference. Luminescence spectra were collected on an Edinburgh FLS1000 spectrometer. Absolute emission quantum yield <η<sub>D</sub>> was measured using an integrating sphere, and calculated with the direct excitation method as follows : <sup>1</sup>

$$\langle \eta_D \rangle = \frac{E_B - E_A}{S_A - S_B} \quad S1$$

in which E and S are respectively the integrals of the emission region and excitation scatter region, while subscripts A and B indicate the blank and sample. The absolute emission quantum yield <η<sub>D</sub>> was given by the FLUORACLE software. Lifetime of the solid samples sealed in a flat quartz cell (12mm diameter, 2 mm height) was measured by an Edinburgh FLS1000 spectrometer with an excitation laser wavelength of 250 nm at room temperature. Biexponential photoluminescence decay curve was analyzed in the lifetime measurement, and average lifetime <τ> was calculated from the decay time and pre-exponential factor using the following equation: <sup>2</sup>

$$\langle \tau \rangle = \frac{\alpha_1 \tau_1 + \alpha_2 \tau_2}{\alpha_1 + \alpha_2} \quad S2$$

where α is a pre-exponential factor representing fractional contribution to the time-resolved decay of the component with a lifetime τ.

### Synthesis of LaI<sub>3</sub>(THF)<sub>4</sub>

Anhydrous LaI<sub>3</sub> (0.24 g, 0.46 mmol) was added into THF (4 mL). After being stirred for ten minutes, the mixture was centrifuged with the insoluble solids (0.26 g, 70%) dried at room temperature. Colorless X-ray-quality crystals of LaI<sub>3</sub>(THF)<sub>4</sub> were grown from the supernatant cooled overnight at -25 °C. <sup>1</sup>H NMR (C<sub>6</sub>D<sub>6</sub>): δ 3.70 (m, THF), 1.40 (m, THF) ppm. <sup>13</sup>C NMR (C<sub>6</sub>D<sub>6</sub>): δ 68.98 (THF), 25.70 (THF).

### Detection of THF in n-hexane

Anhydrous LaI<sub>3</sub> (2 mg, 0.004 mmol) was added into 2 mL n-hexane containing 2 μL THF (0.1% v/v). After being stirred for ten minutes, the mixture was centrifuged with the solids separated and subjected to UV irradiation at 254 nm.

### Detection of gaseous THF in argon atmosphere

2 μL THF was added into a capped 125mL glass bottle loaded with anhydrous 2 mg LaI<sub>3</sub> (0.004 mmol). THF was not in contact with LaI<sub>3</sub> before evaporation. After 30 minutes during which THF completely evaporated, the solids were taken out and irradiated with a UV lamp at 254 nm.

## Quantum chemical calculations

Density functional theory (DFT) and time-dependent DFT (TDDFT) calculations using Gaussian09 program were performed to investigate the luminescent properties of  $\text{LaI}_3(\text{THF})_4$ .<sup>3</sup> The initial structural parameters were obtained from the X-ray crystallographic data. The ground state and singlet excited state geometries were then optimized using the DFT/TDDFT methods with the CAM-B3LYP hybrid functional and ECP46MWB/6-31G(d) basis sets.<sup>4</sup> The MWB large-core ECP basis set was used for La and I, and 6-31G(d) was used for all the other atoms. All of the structures have been verified to be the local minima through frequency analyses. The vertical excitation or emission energy was calculated based on the optimized ground or excited state structures using TDDFT at the CAM-B3LYP/ECP46MWB/6-31G(d) level. Visualization of the optimized structures and frontier molecular orbitals was performed with the Multiwfn 3.7 program.<sup>5</sup>

## II. Characterization

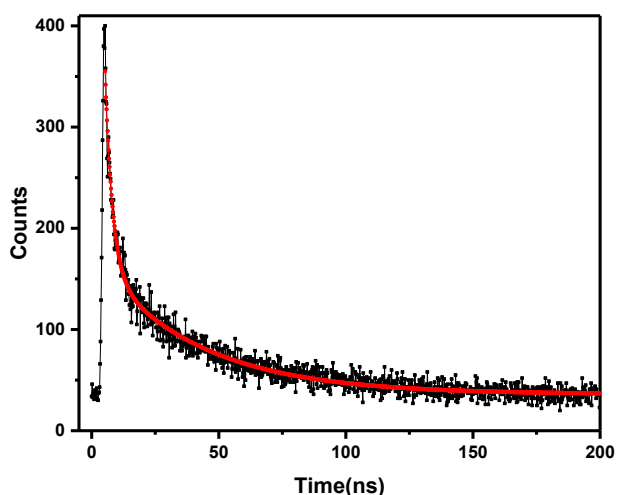

**Fig. S1.** Time-resolved emission intensity decay of  $\text{LaI}_3(\text{THF})_4$  (black) collected at 460 nm upon 250 nm excitation. Biexponential fit is given in red, affording  $\tau_1=2.9$  ns (89.7%),  $\tau_2=39.7$  ns (10.3%),  $R^2=0.9623$ .

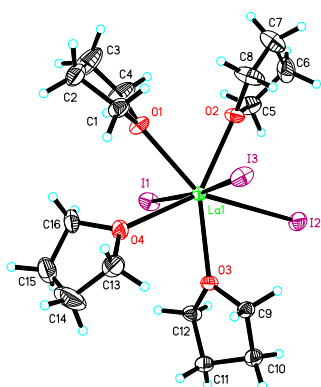

**Fig. S2.** Thermal ellipsoid plot of  $\text{LaI}_3(\text{THF})_4$ , drawn at the 50% probability level.

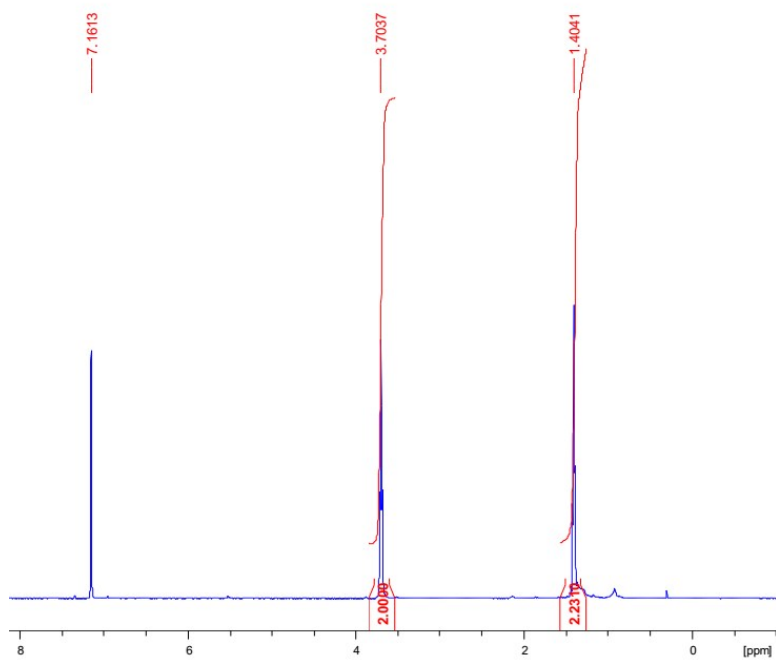

**Fig. S3.**  $^1\text{H}$  NMR spectrum of  $\text{LaI}_3(\text{THF})_4$  at 294.1 K in  $\text{C}_6\text{D}_6$ .

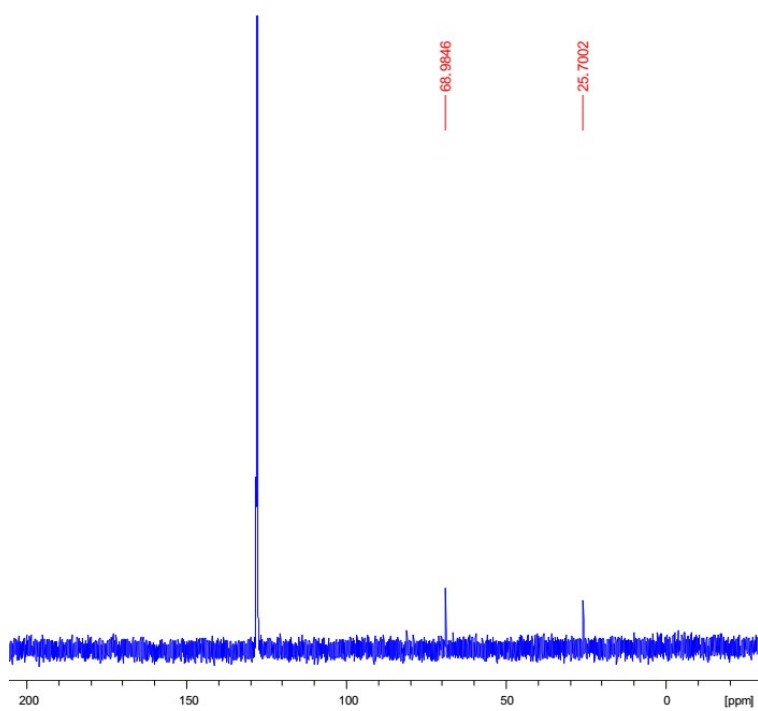

**Fig. S4.**  $^{13}\text{C}$  NMR spectrum of  $\text{LaI}_3(\text{THF})_4$  at 293.7 K in  $\text{C}_6\text{D}_6$ .

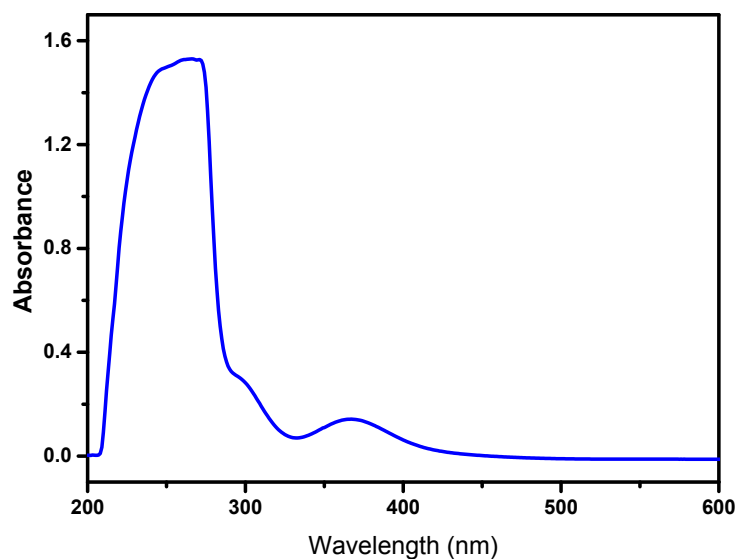

Fig. S5. UV-visible absorption spectrum of  $\text{LaI}_3$  in THF.

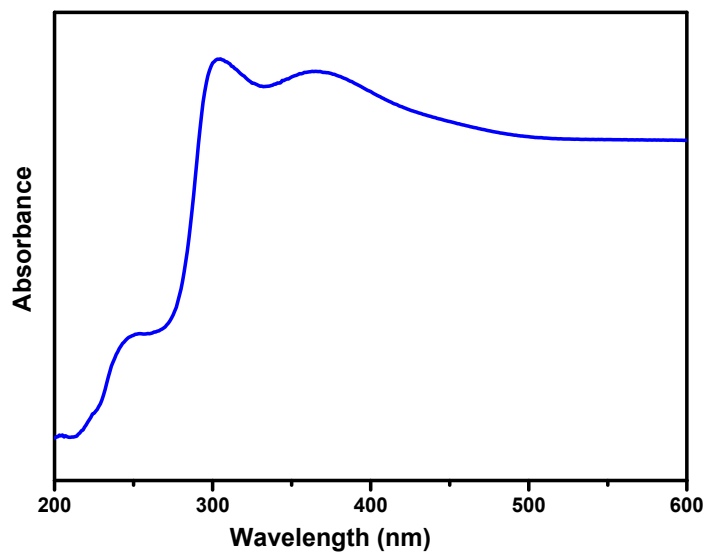

Fig. S6. Diffuse reflectance spectrum of  $\text{LaI}_3(\text{THF})_4$ .

**Table S1.** Crystal data and structure refinements of  $\text{LaI}_3(\text{THF})_4$ 

| $\text{LaI}_3(\text{THF})_4$                |                                                    |
|---------------------------------------------|----------------------------------------------------|
| CCDC No.                                    | 2044769                                            |
| Empirical formula                           | $\text{C}_{16}\text{H}_{32}\text{I}_3\text{LaO}_4$ |
| Formula weight                              | 808.02                                             |
| Temperature/K                               | 192(2)                                             |
| Crystal system                              | Monoclinic                                         |
| Space group                                 | P21/c                                              |
| a /Å                                        | 8.7172(4)                                          |
| b/Å                                         | 17.4748(8)                                         |
| c/Å                                         | 16.6830(8)                                         |
| $\alpha$ /°                                 | 90                                                 |
| $\beta$ /°                                  | 93.060(2)                                          |
| $\gamma$ /°                                 | 90                                                 |
| Volume/Å <sup>3</sup>                       | 2537.7(2)                                          |
| Z                                           | 4                                                  |
| $\rho_{\text{calc}}/\text{cm}^{-3}$         | 2.115                                              |
| $\mu/\text{mm}^{-1}$                        | 5.347                                              |
| F(000)                                      | 1504                                               |
| $\theta$ range/deg                          | 2.614 to 26.000                                    |
| Index ranges                                | -10 ≤ h ≤ 10<br>-21 ≤ k ≤ 21<br>-19 ≤ l ≤ 20       |
| Reflections collected                       | 31983                                              |
| Independent reflections                     | 4991<br>$R_{\text{int}} = 0.0478$                  |
| Completeness                                | 99.8%                                              |
| Data/restraints/parameters                  | 4991 / 0 / 217                                     |
| Goodness-of-fit on F <sup>2</sup>           | 1.081                                              |
| Final R indexes [ $I \geq 2\sigma(I)$ ]     | $R_1 = 0.0317$<br>$wR_2 = 0.0772$                  |
| Final R indexes [all data]                  | $R_1 = 0.0386$<br>$wR_2 = 0.0818$                  |
| Largest diff. peak/hole / e Å <sup>-3</sup> | 1.611/-1.020                                       |

**Cartesian coordinates of LaI<sub>3</sub>(THF)<sub>4</sub> obtained at the CAM-B3LYP level of theory.**

**ground state**

| Atom | X           | Y           | Z           |
|------|-------------|-------------|-------------|
| La   | 0.01141000  | 0.00322000  | -0.00588600 |
| I    | -0.44357500 | 0.43787500  | 3.15707100  |
| I    | 3.26261700  | -0.06042500 | -0.13868800 |
| I    | -0.38448400 | -0.49875400 | -3.16295800 |
| O    | -2.07611800 | 1.56649400  | -0.35247800 |
| O    | 0.76073900  | 2.48169200  | -0.01696400 |
| O    | 0.66387300  | -2.46857300 | 0.33686300  |
| O    | -2.19044200 | -1.43688500 | 0.21972300  |
| C    | -3.06465200 | 1.46871900  | -1.41149600 |
| H    | -2.58852900 | 1.76078400  | -2.35038400 |
| H    | -3.36749100 | 0.42435100  | -1.49280400 |
| C    | -4.17906100 | 2.42123100  | -1.00613200 |
| H    | -4.88364900 | 1.92996500  | -0.32627800 |
| H    | -4.73860400 | 2.78674000  | -1.87016700 |
| C    | -2.36073400 | 2.71616600  | 0.48771400  |
| H    | -1.42231800 | 3.24448100  | 0.65023000  |
| H    | -2.73343900 | 2.35030100  | 1.44871500  |
| C    | 1.07833100  | 3.08453800  | -1.30000600 |
| H    | 1.24012400  | 2.28555300  | -2.02700100 |
| H    | 0.21592300  | 3.68429900  | -1.61269900 |
| C    | 1.27722600  | -3.28129800 | -0.70528600 |
| H    | 0.48617700  | -3.88632700 | -1.16005100 |
| H    | 1.69793500  | -2.61303600 | -1.45650100 |
| C    | 2.31560900  | -4.12885700 | 0.01092200  |
| H    | 2.50541000  | -5.06983000 | -0.51072100 |
| H    | 3.25496100  | -3.57441400 | 0.08865000  |
| C    | 1.68940200  | -4.31634000 | 1.39361300  |
| H    | 2.41639400  | -4.58170900 | 2.16435500  |
| H    | 0.91749500  | -5.09329500 | 1.36854400  |
| C    | 1.07126600  | -2.95086800 | 1.64899400  |
| H    | 1.79963400  | -2.24538300 | 2.05748100  |
| H    | 0.18688100  | -2.96494100 | 2.28798600  |
| C    | -2.36889400 | -2.72345800 | -0.42694900 |
| H    | -2.07968800 | -2.61065000 | -1.47311000 |
| H    | -1.70181700 | -3.44058300 | 0.05892500  |
| C    | -3.83273800 | -3.07669900 | -0.21482900 |
| H    | -4.45469400 | -2.61849800 | -0.99098100 |
| H    | -4.00243200 | -4.15563400 | -0.23655900 |
| C    | -4.11667700 | -2.44165300 | 1.14704000  |
| H    | -3.72374400 | -3.06972900 | 1.95305200  |
| H    | -5.17910200 | -2.27103100 | 1.33569800  |
| C    | -3.33390500 | -1.13993400 | 1.05996400  |
| H    | -2.95878900 | -0.77267500 | 2.01517400  |
| H    | -3.91851800 | -0.35123000 | 0.57533400  |
| C    | -3.40815400 | 3.51785400  | -0.27099800 |
| H    | -2.93172700 | 4.19409900  | -0.98850500 |
| H    | -4.03190200 | 4.11492800  | 0.39806000  |
| C    | 2.08949800  | 4.39529700  | 0.39800100  |
| H    | 1.38067900  | 5.22973300  | 0.43497400  |
| H    | 3.01092100  | 4.70845700  | 0.89372400  |
| C    | 1.49811500  | 3.15273200  | 1.04743400  |
| H    | 0.79725300  | 3.35459600  | 1.85858200  |
| H    | 2.27104400  | 2.46615500  | 1.39896600  |
| C    | 2.31000700  | 3.93704100  | -1.04470500 |
| H    | 2.39236700  | 4.76259700  | -1.75552300 |



H 3.20900200 3.31883200 -1.11600700

**excited state**

| Atom | X           | Y           | Z           |
|------|-------------|-------------|-------------|
| La   | 0.24302600  | -0.01795000 | -0.05981700 |
| I    | 2.67027100  | 0.01628800  | -2.28578700 |
| I    | -3.27408400 | 0.52133500  | -0.79147100 |
| I    | -2.19604000 | -0.32006500 | 2.36245800  |
| O    | 1.99919200  | 1.35171200  | 1.35807000  |
| O    | -0.16393700 | 2.47800200  | -0.66161100 |
| O    | -0.66352500 | -2.33712800 | -0.97561100 |
| O    | 1.72761800  | -1.75580300 | 1.17649900  |
| C    | 1.88723900  | 1.50462600  | 2.78756700  |
| H    | 0.99077100  | 2.09288500  | 3.01127100  |
| H    | 1.76301300  | 0.51138600  | 3.22339400  |
| C    | 3.15909300  | 2.22427000  | 3.21380900  |
| H    | 3.97919500  | 1.51037100  | 3.34663100  |
| H    | 3.03131900  | 2.77418500  | 4.14899500  |
| C    | 3.02817000  | 2.22937100  | 0.83857800  |
| H    | 2.61328600  | 2.76488400  | -0.01608400 |
| H    | 3.85583200  | 1.61016000  | 0.48387700  |
| C    | -0.75507400 | 3.44142600  | 0.24192700  |
| H    | -1.45997100 | 2.91753500  | 0.89058500  |
| H    | 0.04892200  | 3.86908600  | 0.85152400  |
| C    | -1.75128300 | -3.15196700 | -0.46933500 |
| H    | -1.35241200 | -3.79114200 | 0.32590900  |
| H    | -2.50942200 | -2.49311300 | -0.04846500 |
| C    | -2.23968200 | -3.97036800 | -1.65700200 |
| H    | -2.67097000 | -4.92565700 | -1.34851500 |
| H    | -3.00208100 | -3.41408600 | -2.21106700 |
| C    | -0.96999500 | -4.11447800 | -2.49712500 |
| H    | -1.16556300 | -4.35140500 | -3.54546600 |
| H    | -0.32005900 | -4.89496000 | -2.08611000 |
| C    | -0.33361100 | -2.74405300 | -2.32913000 |
| H    | -0.76268700 | -2.01391400 | -3.02268200 |
| H    | 0.75174300  | -2.72323800 | -2.43169300 |
| C    | 1.27758400  | -3.07914500 | 1.55336500  |
| H    | 0.38944900  | -2.96699400 | 2.17899700  |
| H    | 1.00949700  | -3.61705900 | 0.63993200  |
| C    | 2.46373800  | -3.71895300 | 2.26042400  |
| H    | 2.47017700  | -3.44862900 | 3.32135000  |
| H    | 2.44746400  | -4.80868200 | 2.18647100  |
| C    | 3.64762400  | -3.07657100 | 1.53510200  |
| H    | 3.81267500  | -3.55744900 | 0.56569600  |
| H    | 4.58027400  | -3.12196700 | 2.10204300  |
| C    | 3.16485900  | -1.64791600 | 1.33797900  |
| H    | 3.56376900  | -1.15964600 | 0.44794400  |
| H    | 3.36225400  | -1.02762600 | 2.21845800  |
| C    | 3.42538600  | 3.12515800  | 2.00613100  |
| H    | 2.78483600  | 4.01271800  | 2.04826300  |
| H    | 4.46249900  | 3.46067100  | 1.93402000  |
| C    | -0.50882500 | 4.45951300  | -1.89105700 |
| H    | 0.40801500  | 5.03252800  | -1.71656300 |
| H    | -0.99424800 | 4.85672700  | -2.78523600 |
| C    | -0.19512400 | 2.97661200  | -2.02375000 |
| H    | 0.76926400  | 2.74935000  | -2.48000700 |
| H    | -0.98542400 | 2.44522700  | -2.56361000 |
| C    | -1.40768100 | 4.48641400  | -0.65279200 |
| H    | -1.45653500 | 5.46642500  | -0.17242500 |
| H    | -2.42439600 | 4.17616900  | -0.91039900 |

## IV. References

1. K. P. S. Zanoni, R. R. C. Vilela, I. D. A. Silva, N. Y. Murakami Iha, H. Eckert and A. S. S. de Camargo, *Inorg Chem*, 2019, **58**, 4962-4971.
2. S. Chall, S. S. Mati, S. Rakshit and S. C. Bhattacharya, *J Phys Chem C*, 2013, **117**, 25146-25159.
3. (a)M. E. Casida, C. K. Jamorski, C. Casida and D. R. Salahub, *J Chem Phys*, 1998, **108**, 4439-4449; (b)M. J. Frisch, *Gaussian, Inc., Wallingford, CT*, , 2009.
4. (a)T. Yanai, D. P. Tew and N. C. Handy, *Chem Phys Lett*, 2004, **393**, 51-57; (b)M. Dolg, H. Stoll, A. Savin and H. Preuss, *Theor Chim Acta*, 1989, **75**, 173-194; (c)M. Dolg, H. Stoll and H. Preuss, *Theor Chim Acta*, 1993, **85**, 441-450; (d)A. Bergner, M. Dolg, W. Kuechle, H. Stoll and H. Preuss, *Mol Phys*, 1993, **80**, 1431-1441; (e)W. J. Hehre, R. Ditchfield and J. A. Pople, *J Chem Phys*, 1972, **56**, 2257-2261; (f)M. M. Francl, W. J. Pietro, W. J. Hehre, J. S. Binkley, D. J. DeFrees, J. A. Pople and M. S. Gordon, *J Chem Phys*, 1982, **77**, 3654-3665.
5. T. Lu and F. Chen, *J Comput Chem*, 2012, **33**, 580-592.
